# Supplementary material
Source: PubMed Central journal article supplement (PMC2242712)
Supplement: pnas_0709819105_1.pdf [file pnas_0709819105_1.pdf]

## F DH

ArsD 121' APGVKPLSAC MPVLPLTMSL EVMAEVAACL VPGGLGIGFE EVKASRWIEV SDRDSEMLEV

FabA 1" MGWRR PNDADANHPG

ArsD 181' SARVQEVDAD ACLWRIAVAL RREGQEQPST TASVLFSTAY RVDLDLAFGA FSNPYRLPLS

FabA 16" TYRTSIATGR TSPFSMAITL AELVYSELIG LVQRTRVSYF ACFNKIRLTE NMVDKRESYT  
\*

ArsD 241' GEDVYR--ER HMF--HGP-- -----CFH CLTGEIILA- -DEGGVTDLL TRPPTGLFRS

FabA 76" KEDLLASGRG ELFGAKGPQL PAPANMLMMDR VVKMTETGGN FDKGYVEAEL DINPDLWFFG  
\*\* \* \*\* \* \* \* \*

ArsD 286' -IERPQLLID PA--LLDGIGQ FLG---VWAM QHDRVLPVIG FGKLELYRST PPAGTRVPIR

FabA 136" CHFIGDPVMP GCLGLDAMWQ LVGFYLGWLG GEGKGRA-LG VGEVKFTQGV LPTAKKVTYR  
\* \* \* \* \* \* \*

ArsD 341' I---EIVRDE AMTYLANVEI QDGSGGVWLR VREWGGIKFR HPARGLDFFRQPTRHLLSRP

FabA 195" IHFKRIVNRR LIMGLADGEV L-VDGRLIYT ANDLKVGLFQ DTSAF  
\* \*\* \* \* \*

## G PPT

ArsD 481' FAIDSAAAGQ PLVAALEGHA RTPRISIAHC EDRAVALAAE LPVGDIEQI RPRAAGFLES

ACPS 1" MRMIVGHGID IEELASIESA VTRHEGFAKR  
\*\* \* \*\*

ArsD 541' FSTAGERELL DELVAEGAAR DEWITRLWSA KEAAGKLLGS GLDG-ALQRF EAIIVDGAGN

ACPS 31" VLTALEMERF TSL--KGRRQ IEYLAGRWSA KEAFSKAMGT GISKLGFDL EVLNNGERAP  
\* \* \* \* \* \* \*

ArsD 600' FIIQVRDGR LIGVHSVRDG NFVIAAYATTE TAGASGR

ACPS 89" YFSQAPFSGK -IWLSISHTD QFVTASVILE ENHES  
\* \* \*\* \*
