# Supplementary material
Source: PubMed Central journal article supplement (PMC2242712)
Supplement: pnas_0709819105_6.pdf [file pnas_0709819105_6.pdf]

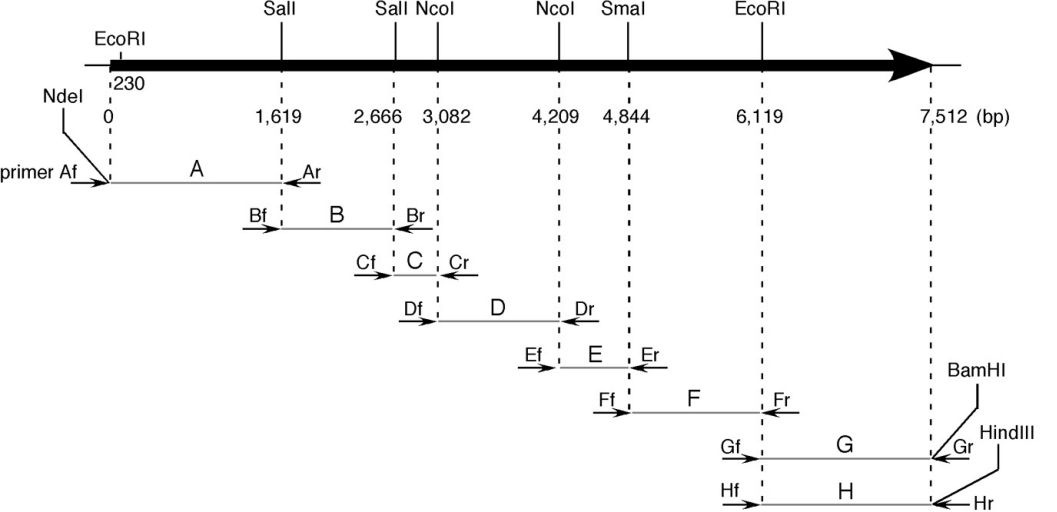

**NdeI**

Af: 5'-CGCAAGCTTCAT**ATG**GCTAGTCATATTGCGATAACACC-3'

Ar: 5'-CGGCAGGATCGCGCCGCT-3'

Bf: 5'-CCTATCTGTTCACCCACGAAATC-3'

Br: 5'-CGACGAGGCGCAGGCCGC-3'

Cf: 5'-CTGCGCGGCACCAACTTCATC-3'

Cr: 5'-GAATTCCCGAGCGCGGTGCCGGTA-3'

Df: 5'-AAGCTTCATCGGCCTGATCGAGGC-3'

Dr: 5'-GGATCCGTCGGCGTCGATCGCCG-3'

Ef: 5'-AAGCTTCGGGCGGAGCAATCCGGGG-3'

Er: 5'-GTACGGCCCTGTCCTTGG-3'

Ff: 5'-GCGGTGTCGGGAGGTGTTTCG-3'

Fr: 5'-ACTCCAGCGAGCCGGGGTC-3'

Gf: 5'-GCTGGGCGGTGGTTCGCTTC-3'

**BamHI**  
Gr: 5'-GGATCCAAACCTCAACCGTGGCC-3'

Hf: 5'-GCTTCAATTGCACCCCGGC-3'

**HindIII**  
Hr: 5'-AAAAAAAAG**CTT**GGATTGGCGCCCCGATTTCG-3'
