# Supplementary material
Source: PubMed Central journal article supplement (PMC2242712)

1

2

3

4

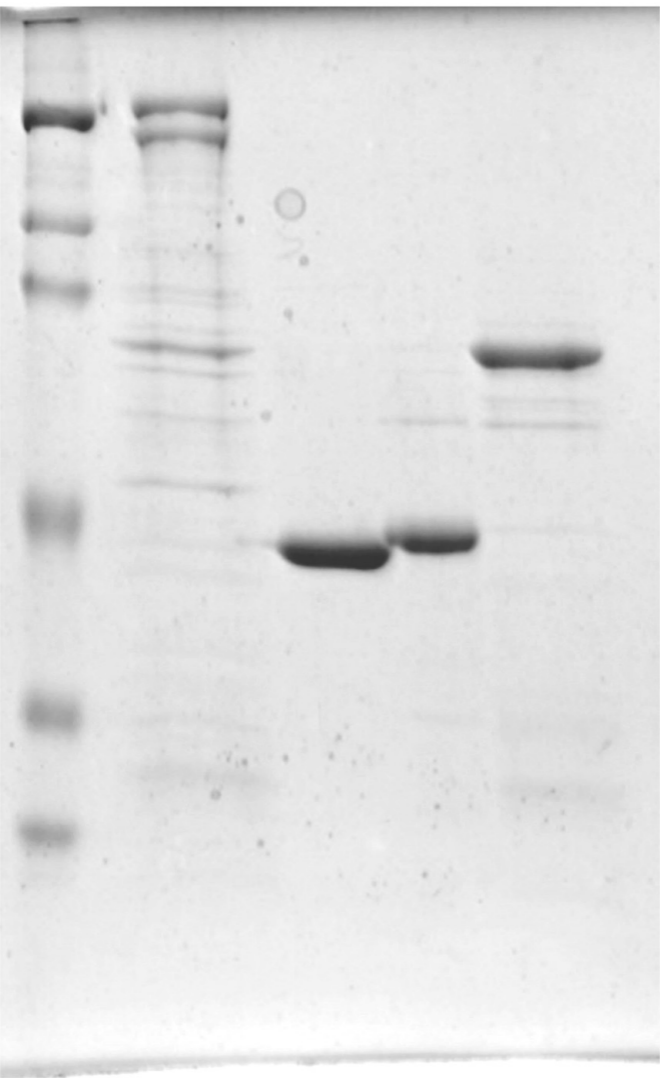

Supplement: pnas_0709819105_2.pdf [file pnas_0709819105_2.pdf]

**A**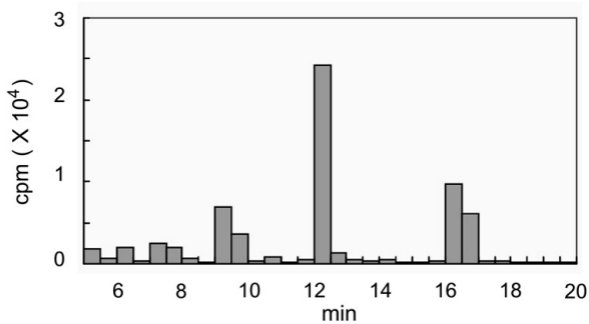**B**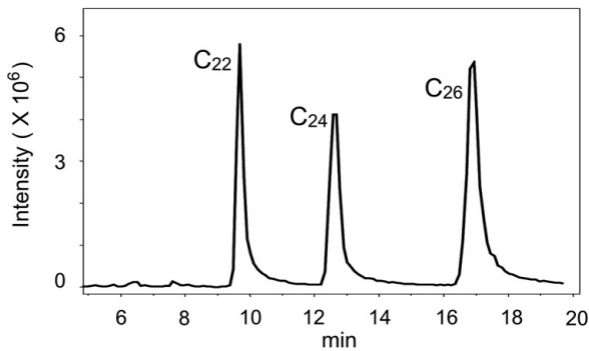

Supplement: pnas_0709819105_3.pdf [file pnas_0709819105_3.pdf]

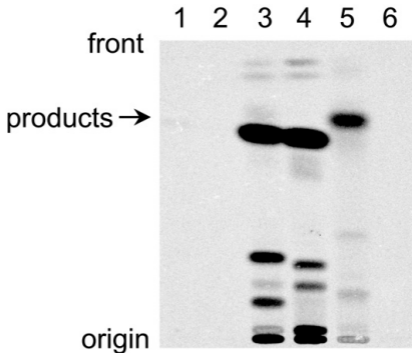

|                                 | 1 | 2 | 3 | 4 | 5 | 6 |
|---------------------------------|---|---|---|---|---|---|
| ArsAD                           | + | - | + | - | + | - |
| [ <sup>14</sup> C]acetyl-CoA    | + | + | - | - | - | - |
| [ <sup>14</sup> C]palmitoyl-CoA | - | - | + | + | - | - |
| malonyl-CoA                     | + | + | + | + | - | - |
| [ <sup>14</sup> C]malonyl-CoA   | - | - | - | - | + | + |

Supplement: pnas_0709819105_4.pdf [file pnas_0709819105_4.pdf]

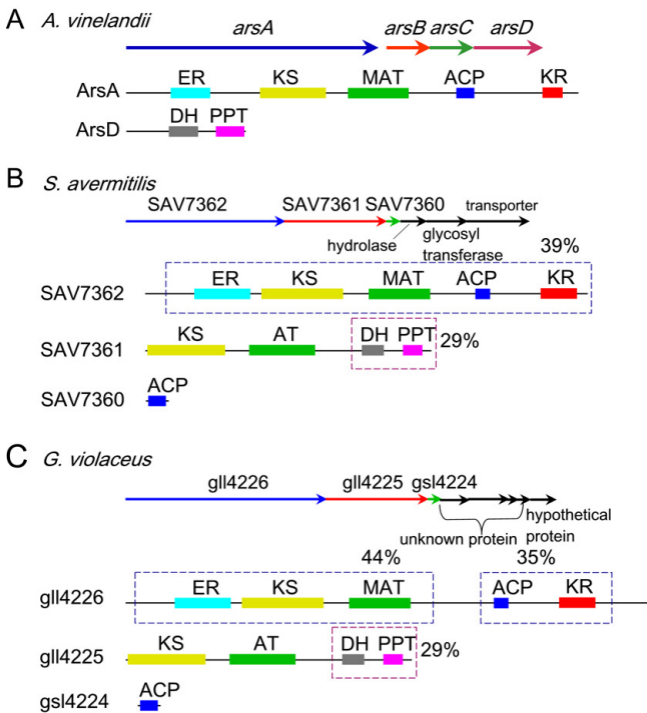

Supplement: pnas_0709819105_5.pdf [file pnas_0709819105_5.pdf]

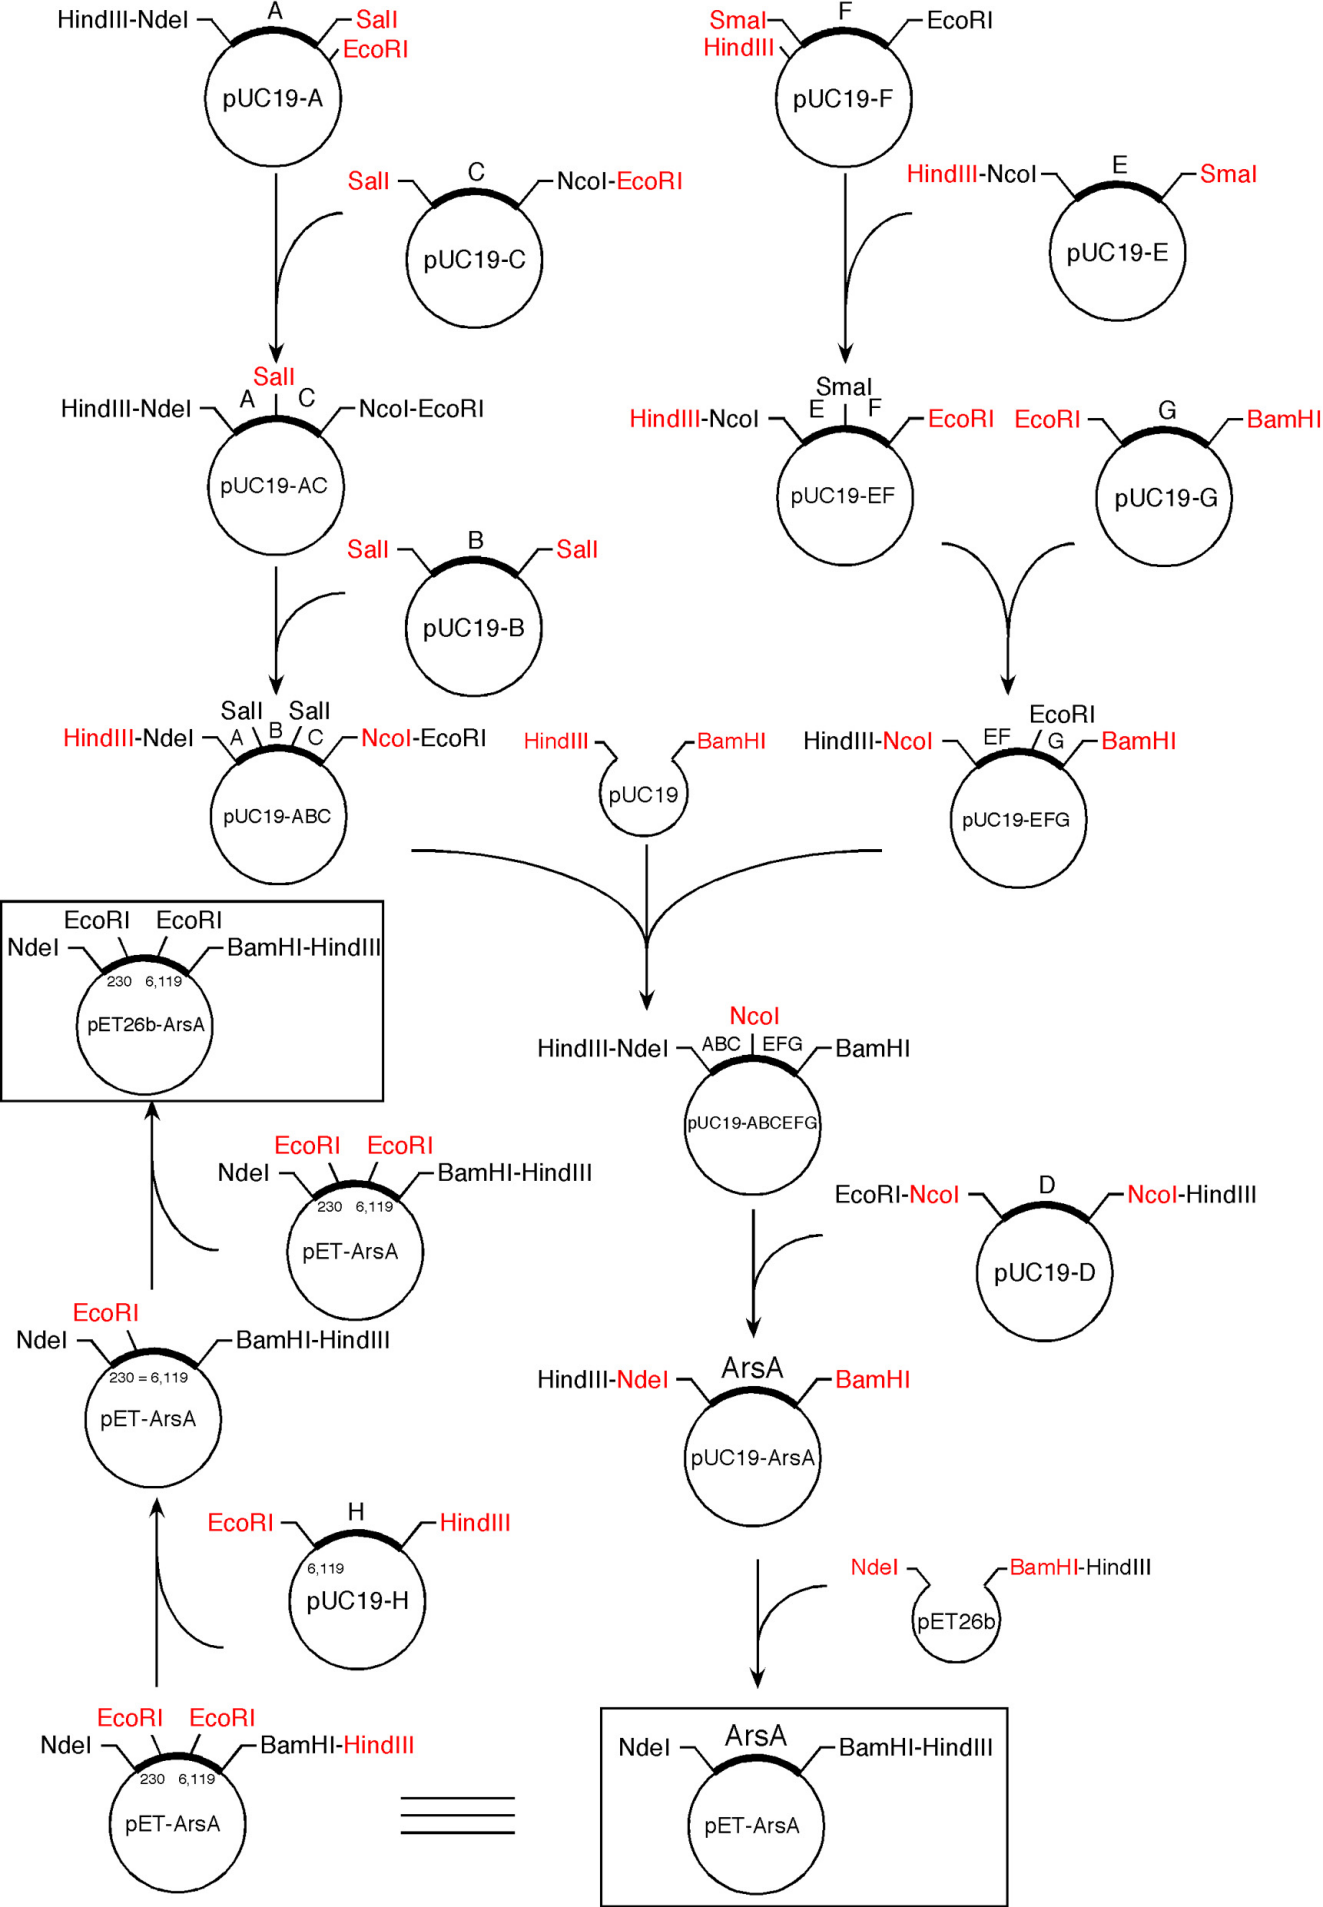

Supplement: pnas_0709819105_7.pdf [file pnas_0709819105_7.pdf]
